# Supplementary material for: A 30-year update of the climbers and vascular epiphytes inventory of the Cerro Ñielol Natural Monument (La Araucanía, Chile): a database
Source: Biodivers Data J. 2021 Sep 15;9:e72521. doi: 10.3897/BDJ.9.e72521 (PMC8458268; doi:10.3897/BDJ.9.e72521)
Supplement: Supplementary material 1 — A 30-year update of the climbers and vascular epiphyte inventory of the Cerro Ñielol Natural Monument: a database [file bdj-09-e72521-s001.csv]

id	Quadrant	Latitude	Longitude	ID species	Species	Abundance	Habit	Growth form	Climbing mechanism	ID Host/substrate	Microhabitat	Host/tree	Host condition	Host DHB	2.3 m in height	Date	Observer name	Notes
1	1	-38.727.155	-72.587.709	1	Lardizabala biternata	4	Shrub	Liana	Twining	1	Trunk	Nothofagus obliqua	Live	103	Yes	2014-11-14	J. Pincheira-Ulbrich	Peumus boldus outside the quadrant (one tree).
2	1	-38.727.155	-72.587.709	2	Cissus striata	1	Shrub	Liana	Tendrils	1	Trunk	Nothofagus obliqua	Live	103	No	2014-11-14	J. Pincheira-Ulbrich
3	1	-38.727.155	-72.587.709	3	Sarmienta scandens	14	Subshrubs	Epiphyte	Adhesive roots	2	Fallen log	NA	Woody debris	NA	No	2014-11-14	J. Pincheira-Ulbrich
4	1	-38.727.155	-72.587.709	4	Chusquea quila	6	Herb	Terricolous	NA	3	Soil	NA	NA	NA	No	2014-11-14	J. Pincheira-Ulbrich
5	1	-38.727.155	-72.587.709	5	Lardizabala biternata	6	Shrub	Liana	Twining	3	Soil	NA	NA	NA	No	2014-11-14	J. Pincheira-Ulbrich
6	1	-38.727.155	-72.587.709	6	Lapageria rosea	30	Shrub	Vine	Twining	3	Soil	NA	NA	NA	No	2014-11-14	J. Pincheira-Ulbrich
7	2	-38.727.344	-72.587.254	7	Cissus striata	4	Shrub	Liana	Tendrils	4	Trunk	Cryptocarya alba	Live	30	Yes	2014-11-14	J. Pincheira-Ulbrich	10 Cryptocarya alba saplings
8	2	-38.727.344	-72.587.254	8	Luzuriaga radicans	1	Subshrubs	Vine	Adhesive roots	5	Soil	NA	NA	NA	No	2014-11-14	J. Pincheira-Ulbrich	Lardizabala biternata out of the quadrant (abundant)
9	2	-38.727.344	-72.587.254	9	Lapageria rosea	3	Shrub	Vine	Twining	5	Soil	NA	NA	NA	No	2014-11-14	J. Pincheira-Ulbrich	Aextoxicon punctatum saplings
10	2	-38.727.344	-72.587.254	10	Chusquea quila	10	Herb	Terricolous	NA	5	Soil	NA	NA	NA	No	2014-11-14	J. Pincheira-Ulbrich
11	2	-38.727.344	-72.587.254	11	Hymenophyllum tunbrigense	10	Herb	Terricolous	NA	5	Soil	NA	NA	NA	No	2014-11-14	J. Pincheira-Ulbrich
12	2	-38.727.344	-72.587.254	12	Hymenophyllum tunbrigense	134	Herb	Terricolous	NA	6	Footpath slope	NA	NA	NA	No	2014-11-14	J. Pincheira-Ulbrich
13	2	-38.727.344	-72.587.254	13	Sarmienta scandens	46	Subshrubs	Epiphyte	Adhesive roots	7	Trunk	UD	Snag	NA	No	2014-11-14	J. Pincheira-Ulbrich
14	2	-38.727.344	-72.587.254	14	Lardizabala biternata	1	Shrub	Liana	Twining	8	Fallen log	UD	Woody debris	NA	No	2014-11-14	J. Pincheira-Ulbrich
15	3	-38.727.158	-72.586.972	15	Asplenium dareoides	469	Herb	Epiphyte	NA	9	Trunk	Nothofagus obliqua	Snag	UD	No	2014-11-21	J. Pincheira-Ulbrich	Other species on the trunk, but outside the quadrant: Sarmienta repens, Hedera helix, Polypodium feuillei, Hymenophyllum plicatum
16	3	-38.727.158	-72.586.972	16	Synammia feuillei	UD	Herb	Epiphyte	NA	9	Trunk	Nothofagus obliqua	Snag	UD	Yes	2014-11-21	J. Pincheira-Ulbrich	Proustia pyrifolia outside the quadrant
17	3	-38.727.158	-72.586.972	17	Sarmienta scandens	UD	Subshrubs	Epiphyte	Adhesive roots	9	Trunk	Nothofagus obliqua	Snag	UD	Yes	2014-11-21	J. Pincheira-Ulbrich
18	3	-38.727.158	-72.586.972	18	Lapageria rosea	4	Shrub	Vine	Twining	10	Soil	NA	NA	NA	No	2014-11-21	J. Pincheira-Ulbrich	One small Citronella mucronata tree (1.5 m high)
19	3	-38.727.158	-72.586.972	19	Proustia pyrifolia	6	Shrub	Liana	Scrambling	10	Soil	NA	NA	NA	No	2014-11-21	J. Pincheira-Ulbrich	One Cryptocarya alba sapling
20	3	-38.727.158	-72.586.972	20	Cissus striata	1	Shrub	Liana	Tendrils	10	Soil	NA	NA	NA	No	2014-11-21	J. Pincheira-Ulbrich
21	3	-38.727.158	-72.586.972	21	Hedera helix	1	Shrub	Vine	Adhesive roots	11	Soil	NA	Live	NA	No	2014-11-21	J. Pincheira-Ulbrich
22	3	-38.727.158	-72.586.972	NA	NA	NA	NA	NA	NA	92	NA	Citronella mucronata	NA	4	No	2014-11-21	J. Pincheira-Ulbrich
23	3	-38.727.158	-72.586.972	NA	NA	NA	NA	NA	NA	76	NA	Cryptocarya alba	Live	30	No	2014-11-21	J. Pincheira-Ulbrich
24	3	-38.727.158	-72.586.972	NA	NA	NA	NA	NA	NA	77	NA	Cryptocarya alba	Live	39	No	2014-11-21	J. Pincheira-Ulbrich
25	4	-38.727.592	-72.586.164	22	Asplenium trilobum	522	Herb	Epiphyte	NA	12	Trunk	Cryptocarya alba	Live	UD	Yes	2014-11-21	J. Pincheira-Ulbrich	Cryptocarya alba saplings
26	4	-38.727.592	-72.586.164	23	Bomarea salsilla	1	Herb	Vine	Twining	13	Soil	NA	NA	NA	No	2014-11-21	J. Pincheira-Ulbrich	Aextoxicon punctatum outside the quadrant
27	4	-38.727.592	-72.586.164	24	Proustia pyrifolia	1	Shrub	Liana	Scrambling	13	Soil	NA	NA	NA	No	2014-11-21	J. Pincheira-Ulbrich
28	4	-38.727.592	-72.586.164	25	Synammia feuillei	4	Herb	Epiphyte	NA	14	Trunk	Peumus boldus	Live	UD	Yes	2014-11-21	J. Pincheira-Ulbrich	Outside the quadrant: Lapageria rosea, Luzuriaga radicans
29	4	-38.727.592	-72.586.164	NA	NA	NA	NA	NA	NA	15	NA	Peumus boldus	NA	NA	Yes	2014-11-21	J. Pincheira-Ulbrich
30	4	-38.727.592	-72.586.164	26	Sarmienta scandens	1	Subshrubs	Epiphyte	Adhesive roots	16	Trunk	Cryptocarya alba	Live	UD	Yes	2014-11-21	J. Pincheira-Ulbrich
31	4	-38.727.592	-72.586.164	27	Asplenium trilobum	32	Herb	Epiphyte	NA	17	Trunk	Cryptocarya alba	Live	UD	No	2014-11-21	J. Pincheira-Ulbrich
32	4	-38.727.592	-72.586.164	28	Sarmienta scandens	5	Subshrubs	Epiphyte	Adhesive roots	17	Trunk	Cryptocarya alba	Live	UD	No	2014-11-21	J. Pincheira-Ulbrich
33	4	-38.727.592	-72.586.164	NA	NA	NA	NA	NA	NA	78	NA	Cryptocarya alba	Live	25	No	2014-11-21	J. Pincheira-Ulbrich
34	4	-38.727.592	-72.586.164	NA	NA	NA	NA	NA	NA	79	NA	Cryptocarya alba	Live	26	No	2014-11-21	J. Pincheira-Ulbrich
35	4	-38.727.592	-72.586.164	NA	NA	NA	NA	NA	NA	80	NA	Cryptocarya alba	Live	33	No	2014-11-21	J. Pincheira-Ulbrich
36	4	-38.727.592	-72.586.164	NA	NA	NA	NA	NA	NA	81	NA	Peumus boldus	Live	13	No	2014-11-21	J. Pincheira-Ulbrich
37	4	-38.727.592	-72.586.164	NA	NA	NA	NA	NA	NA	82	NA	Peumus boldus	Live	7,5	No	2014-11-21	J. Pincheira-Ulbrich
38	5	-38.727.298	-72.585.909	29	Tropaeolum ciliatum	2	Herb	Vine	Twining	18	Trunk	Cryptocarya alba	Live	UD	Yes	2014-11-21	J. Pincheira-Ulbrich	Outside the quadrant: Lomatia dentata, Sarmienta repens, Proustia pyrifolia, Bomarea salsilla, Muehlenbeckia hastulata
39	5	-38.727.298	-72.585.909	30	Lapageria rosea	1	Shrub	Vine	Twining	18	Trunk	Cryptocarya alba	Live	UD	Yes	2014-11-21	J. Pincheira-Ulbrich	Cryptocarya alba saplings
40	5	-38.727.298	-72.585.909	31	Hymenophyllum plicatum	15	Herb	Epiphyte	NA	18	Trunk	Cryptocarya alba	Live	UD	Yes	2014-11-21	J. Pincheira-Ulbrich
41	5	-38.727.298	-72.585.909	32	Cissus striata	1	Shrub	Liana	Tendrils	19	Soil	NA	NA	NA	No	2014-11-21	J. Pincheira-Ulbrich
42	5	-38.727.298	-72.585.909	33	Tropaeolum ciliatum	1	Herb	Vine	Twining	19	Soil	NA	NA	NA	No	2014-11-21	J. Pincheira-Ulbrich
43	5	-38.727.298	-72.585.909	34	Lapageria rosea	2	Shrub	Vine	Twining	19	Soil	NA	NA	NA	No	2014-11-21	J. Pincheira-Ulbrich
44	5	-38.727.298	-72.585.909	35	Hymenophyllum plicatum	230	Herb	Epiphyte	NA	20	Trunk	Cryptocarya alba	Live	UD	No	2014-11-21	J. Pincheira-Ulbrich
45	5	-38.727.298	-72.585.909	36	Muehlenbeckia hastulata	1	Shrub	Vine	Twining	75	Soil	NA	NA	NA	No	2014-11-21	J. Pincheira-Ulbrich
46	5	-38.727.298	-72.585.909	NA	NA	NA	NA	NA	NA	83	NA	Cryptocarya alba	Live	37,5	No	2014-11-21	J. Pincheira-Ulbrich
47	5	-38.727.298	-72.585.909	NA	NA	NA	NA	NA	NA	84	NA	Cryptocarya alba	Live	37,5	No	2014-11-21	J. Pincheira-Ulbrich
48	5	-38.727.298	-72.585.909	NA	NA	NA	NA	NA	NA	88	NA	Lomatia dentata	Live	2	No	2014-11-21	J. Pincheira-Ulbrich
49	6	-38.726.415	-72.585.893	37	Raukaua valdiviensis	1	Shrub	Liana	Adhesive roots	21	Trunk	Persea lingue	Live	33,5	No	2014-11-28	J. Pincheira-Ulbrich	Asplenium dareoides outside the quadrant
50	6	-38.726.415	-72.585.893	38	Asplenium trilobum	33	Herb	Epiphyte	NA	21	Trunk	Persea lingue	Live	33,5	No	2014-11-28	J. Pincheira-Ulbrich	Four Aextoxicon punctatum trees
51	6	-38.726.415	-72.585.893	39	Hymenophyllum plicatum	93	Herb	Epiphyte	NA	21	Trunk	Persea lingue	Live	33,5	No	2014-11-28	J. Pincheira-Ulbrich
52	6	-38.726.415	-72.585.893	40	Hymenophyllum plicatum	28	Herb	Epiphyte	NA	22	Trunk	Aextoxicon punctatum	Live	9	No	2014-11-28	J. Pincheira-Ulbrich
53	6	-38.726.415	-72.585.893	41	Hymenophyllum plicatum	55	Herb	Epiphyte	NA	23	Stump	NA	Woody debris	NA	No	2014-11-28	J. Pincheira-Ulbrich
54	6	-38.726.415	-72.585.893	42	Lapageria rosea	3	Shrub	Vine	Twining	24	Soil	NA	NA	NA	No	2014-11-28	J. Pincheira-Ulbrich
55	6	-38.726.415	-72.585.893	43	Luzuriaga radicans	3	Subshrubs	Vine	Adhesive roots	24	Soil	NA	NA	NA	No	2014-11-28	J. Pincheira-Ulbrich
56	6	-38.726.415	-72.585.893	NA	NA	NA	NA	NA	NA	85	NA	Aextoxicon punctatum	Live	9	No	2014-11-28	J. Pincheira-Ulbrich
57	6	-38.726.415	-72.585.893	NA	NA	NA	NA	NA	NA	86	NA	Persea lingue	Live	33,5	No	2014-11-28	J. Pincheira-Ulbrich
58	7	-38.726.257	-72.586.117	44	Asplenium trilobum	25	Herb	Epiphyte	NA	93	Soil	NA	NA	NA	No	2014-11-28	J. Pincheira-Ulbrich	Cryptocarya alba saplings
59	7	-38.726.257	-72.586.117	45	Asplenium dareoides	10	Herb	Epiphyte	NA	25	Trunk	Nothofagus obliqua	Live	62	Yes	2014-11-28	J. Pincheira-Ulbrich
60	7	-38.726.257	-72.586.117	46	Synammia feuillei	2	Herb	Epiphyte	NA	25	Trunk	Nothofagus obliqua	Live	62	Yes	2014-11-28	J. Pincheira-Ulbrich
61	7	-38.726.257	-72.586.117	47	Fascicularia bicolor	6	Herb	Epiphyte	NA	25	Trunk	Nothofagus obliqua	Live	62	Yes	2014-11-28	J. Pincheira-Ulbrich
62	7	-38.726.257	-72.586.117	48	Sarmienta scandens	1	Subshrubs	Epiphyte	Adhesive roots	25	Trunk	Nothofagus obliqua	Live	62	Yes	2014-11-28	J. Pincheira-Ulbrich
63	7	-38.726.257	-72.586.117	49	Raukaua valdiviensis	1	Shrub	Liana	Adhesive roots	26	Trunk	Aextoxicon punctatum	Live	67	No	2014-11-28	J. Pincheira-Ulbrich
64	7	-38.726.257	-72.586.117	50	Lapageria rosea	1	Shrub	Vine	Twining	26	Trunk	Aextoxicon punctatum	Live	67	No	2014-11-28	J. Pincheira-Ulbrich
65	7	-38.726.257	-72.586.117	51	Synammia feuillei	2	Herb	Epiphyte	NA	26	Trunk	Aextoxicon punctatum	Live	67	No	2014-11-28	J. Pincheira-Ulbrich
66	7	-38.726.257	-72.586.117	52	Raukaua valdiviensis	7	Shrub	Liana	Adhesive roots	27	Soil	NA	NA	NA	No	2014-11-28	J. Pincheira-Ulbrich
67	7	-38.726.257	-72.586.117	53	Lapageria rosea	1	Shrub	Vine	Twining	27	Soil	NA	NA	NA	No	2014-11-28	J. Pincheira-Ulbrich
68	7	-38.726.257	-72.586.117	54	Hymenophyllum krauseanum	80	Herb	Epiphyte	NA	28	Stump	NA	Woody debris	NA	No	2014-11-28	J. Pincheira-Ulbrich
69	8	-38.726.046	-72.586.343	55	Raukaua valdiviensis	2	Shrub	Liana	Adhesive roots	29	Trunk	Persea lingue	Live	46	No	2014-11-28	J. Pincheira-Ulbrich	Hydrangea serratifolia on the trunk but outside the quadrant
70	8	-38.726.046	-72.586.343	56	Hymenophyllum krauseanum	32	Herb	Epiphyte	NA	29	Trunk	Persea lingue	Live	46	No	2014-11-28	J. Pincheira-Ulbrich
71	8	-38.726.046	-72.586.343	57	Hymenophyllum plicatum	98	Herb	Epiphyte	NA	30	Trunk	UD	Snag	32	No	2014-11-28	J. Pincheira-Ulbrich
72	8	-38.726.046	-72.586.343	58	Sarmienta scandens	3	Subshrubs	Epiphyte	Adhesive roots	30	Trunk	UD	Snag	32	Yes	2014-11-28	J. Pincheira-Ulbrich
73	8	-38.726.046	-72.586.343	59	Lapageria rosea	3	Shrub	Vine	Twining	31	Soil	NA	NA	NA	No	2014-11-28	J. Pincheira-Ulbrich
74	8	-38.726.046	-72.586.343	60	Hydrangea serratifolia	1	Shrub	Liana	Adhesive roots	31	Soil	NA	NA	NA	No	2014-11-28	J. Pincheira-Ulbrich
75	8	-38.726.046	-72.586.343	61	Raukaua valdiviensis	10	Shrub	Liana	Adhesive roots	31	Soil	NA	NA	NA	No	2014-11-28	J. Pincheira-Ulbrich
76	9	-38.726.857	-72.589.858	62	Hydrangea serratifolia	37	Shrub	Liana	Adhesive roots	32	Footpath slope	NA	NA	NA	No	2014-12-12	J. Pincheira-Ulbrich
77	9	-38.726.857	-72.589.858	63	Nertera granadensis	9	Herb	Terricolous	NA	32	Footpath slope	NA	NA	NA	No	2014-12-12	J. Pincheira-Ulbrich
78	9	-38.726.857	-72.589.858	64	Cissus striata	5	Shrub	Liana	Tendrils	32	Footpath slope	NA	NA	NA	No	2014-12-12	J. Pincheira-Ulbrich
79	9	-38.726.857	-72.589.858	65	Chusquea quila	10	Herb	Terricolous	NA	32	Footpath slope	NA	NA	NA	No	2014-12-12	J. Pincheira-Ulbrich
80	9	-38.726.857	-72.589.858	66	Tropaeolum ciliatum	3	Herb	Vine	Twining	32	Footpath slope	NA	NA	NA	No	2014-12-12	J. Pincheira-Ulbrich
81	10	-38.727.142	-72.590.136	67	Cissus striata	8	Shrub	Liana	Tendrils	33	Footpath slope	NA	NA	NA	No	2014-12-12	J. Pincheira-Ulbrich	Outside the quadrant: Galium hypocarpium, Lapageria rosea, Proustia pyrifolia, Nertera granadensis, Boquila trifoliolata
82	10	-38.727.142	-72.590.136	68	Hydrangea serratifolia	16	Shrub	Liana	Adhesive roots	33	Footpath slope	NA	NA	NA	No	2014-12-12	J. Pincheira-Ulbrich
83	10	-38.727.142	-72.590.136	69	Luzuriaga radicans	16	Subshrubs	Vine	Adhesive roots	33	Footpath slope	NA	NA	NA	No	2014-12-12	J. Pincheira-Ulbrich
84	10	-38.727.142	-72.590.136	70	Lapageria rosea	1	Shrub	Vine	Twining	33	Footpath slope	NA	NA	NA	No	2014-12-12	J. Pincheira-Ulbrich
85	10	-38.727.142	-72.590.136	71	Raukaua valdiviensis	1	Shrub	Liana	Adhesive roots	33	Footpath slope	NA	NA	NA	No	2014-12-12	J. Pincheira-Ulbrich
86	10	-38.727.142	-72.590.136	72	Hymenophyllum plicatum	37	Herb	Epiphyte	NA	33	Footpath slope	NA	NA	NA	No	2014-12-12	J. Pincheira-Ulbrich
87	10	-38.727.142	-72.590.136	73	Chusquea quila	5	Herb	Terricolous	NA	33	Footpath slope	NA	NA	NA	No	2014-12-12	J. Pincheira-Ulbrich
88	10	-38.727.142	-72.590.136	74	Hymenophyllum tunbrigense	70	Herb	Terricolous	NA	33	Footpath slope	NA	NA	NA	No	2014-12-12	J. Pincheira-Ulbrich
89	10	-38.727.142	-72.590.136	75	Galium hypocarpium	1	Herb	Terricolous	NA	34	Footpath slope	NA	NA	NA	No	2014-12-12	J. Pincheira-Ulbrich
90	10	-38.727.142	-72.590.136	76	Boquila trifoliolata	1	Shrub	Vine	NA	34	Footpath slope	NA	NA	NA	No	2014-12-12	J. Pincheira-Ulbrich
91	11	-38.725.255	-72.589.969	77	Hymenophyllum tunbrigense	780	Herb	Terricolous	NA	34	Footpath slope	NA	NA	NA	No	2014-12-12	J. Pincheira-Ulbrich	Cryptocarya alba saplings
92	11	-38.725.255	-72.589.969	78	Sarmienta scandens	1	Subshrubs	Epiphyte	Adhesive roots	34	Footpath slope	NA	NA	NA	No	2014-12-12	J. Pincheira-Ulbrich	Outside the quadrant: Hymenophyllum dentatum, Sarmienta repens
93	11	-38.725.255	-72.589.969	79	Bomarea salsilla	1	Herb	Vine	Twining	34	Footpath slope	NA	NA	NA	No	2014-12-12	J. Pincheira-Ulbrich
94	11	-38.725.255	-72.589.969	80	Hymenophyllum plicatum	20	Herb	Epiphyte	NA	34	Footpath slope	NA	NA	NA	No	2014-12-12	J. Pincheira-Ulbrich
95	11	-38.725.255	-72.589.969	81	Sarmienta scandens	25	Subshrubs	Epiphyte	Adhesive roots	72	Trunk	Cryptocarya alba	Live	UD	No	2014-12-12	J. Pincheira-Ulbrich
96	11	-38.725.255	-72.589.969	83	Synammia feuillei	18	Herb	Epiphyte	NA	72	Trunk	Cryptocarya alba	Live	UD	No	2014-12-12	J. Pincheira-Ulbrich
97	12	-38.725.066	-72.589.953	84	Acer pseudoplatanus	1	Tree	Accidental epiphyte	NA	35	Trunk	Cryptocarya alba	Live	41	Yes	2014-12-12	J. Pincheira-Ulbrich	Outside the quadrant: Bomarea salsilla, Vicia vicina, Hymenophyllum dentatum
98	12	-38.725.066	-72.589.953	85	Asplenium trilobum	46	Herb	Epiphyte	NA	35	Trunk	Cryptocarya alba	Live	41	Yes	2014-12-12	J. Pincheira-Ulbrich
99	12	-38.725.066	-72.589.953	86	Hymenophyllum plicatum	163	Herb	Epiphyte	NA	35	Trunk	Cryptocarya alba	Live	41	No	2014-12-12	J. Pincheira-Ulbrich
100	12	-38.725.066	-72.589.953	87	Synammia feuillei	12	Herb	Epiphyte	NA	35	Trunk	Cryptocarya alba	Live	41	Yes	2014-12-12	J. Pincheira-Ulbrich
101	12	-38.725.066	-72.589.953	NA	NA	NA	NA	NA	NA	36	NA	Cryptocarya alba	Live	UD	No	2014-12-12	J. Pincheira-Ulbrich
102	12	-38.725.066	-72.589.953	88	Sarmienta scandens	20	Subshrubs	Epiphyte	Adhesive roots	37	Trunk	Cryptocarya alba	Live	50	No	2014-12-12	J. Pincheira-Ulbrich
103	12	-38.725.066	-72.589.953	89	Hymenophyllum dentatum	6	Herb	Epiphyte	NA	37	Trunk	Cryptocarya alba	Live	50	No	2014-12-12	J. Pincheira-Ulbrich
104	12	-38.725.066	-72.589.953	90	Hymenophyllum plicatum	321	Herb	Epiphyte	NA	37	Trunk	Cryptocarya alba	Live	50	No	2014-12-12	J. Pincheira-Ulbrich
105	12	-38.725.066	-72.589.953	91	Sarmienta scandens	4	Subshrubs	Epiphyte	Adhesive roots	37	Trunk	Cryptocarya alba	Live	50	Yes	2014-12-12	J. Pincheira-Ulbrich
106	12	-38.725.066	-72.589.953	92	Hymenophyllum plicatum	200	Herb	Epiphyte	NA	37	Trunk	Cryptocarya alba	Live	50	Yes	2014-12-12	J. Pincheira-Ulbrich
107	12	-38.725.066	-72.589.953	93	Bomarea salsilla	1	Herb	Vine	Twining	38	Soil	NA	NA	NA	No	2014-12-12	J. Pincheira-Ulbrich
108	12	-38.725.066	-72.589.953	94	Chusquea quila	10	Herb	Terricolous	NA	38	Soil	NA	NA	NA	No	2014-12-12	J. Pincheira-Ulbrich
109	12	-38.725.066	-72.589.953	95	Cissus striata	2	Shrub	Liana	Tendrils	38	Soil	NA	NA	NA	No	2014-12-12	J. Pincheira-Ulbrich
110	13	-38.721.770	-72.587.844	96	Raukaua valdiviensis	6	Shrub	Liana	Adhesive roots	39	Trunk	Aextoxicon punctatum	Live	35	Yes	2014-12-19	J. Pincheira-Ulbrich	Eucryphia cordifolia saplings
111	13	-38.721.770	-72.587.844	97	Vicia vicina	1	Herb	Vine	Tendrils	39	Trunk	Aextoxicon punctatum	Live	35	No	2014-12-19	J. Pincheira-Ulbrich
112	13	-38.721.770	-72.587.844	98	Lapageria rosea	1	Shrub	Vine	Twining	39	Trunk	Aextoxicon punctatum	Live	35	Yes	2014-12-19	J. Pincheira-Ulbrich
113	13	-38.721.770	-72.587.844	99	Muehlenbeckia hastulata	1	Shrub	Vine	Twining	39	Trunk	Aextoxicon punctatum	Live	35	Yes	2014-12-19	J. Pincheira-Ulbrich
114	13	-38.721.770	-72.587.844	100	Hymenophyllum plicatum	7	Herb	Epiphyte	NA	39	Trunk	Aextoxicon punctatum	Live	35	No	2014-12-19	J. Pincheira-Ulbrich
115	13	-38.721.770	-72.587.844	101	Raukaua valdiviensis	10	Shrub	Liana	Adhesive roots	40	Soil	NA	NA	NA	No	2014-12-19	J. Pincheira-Ulbrich
116	13	-38.721.770	-72.587.844	102	Lapageria rosea	1	Shrub	Vine	Twining	40	Soil	NA	NA	NA	No	2014-12-19	J. Pincheira-Ulbrich
117	13	-38.721.770	-72.587.844	103	Hymenophyllum plicatum	12	Herb	Epiphyte	NA	41	Trunk	Aextoxicon punctatum	Live	17,2	No	2014-12-19	J. Pincheira-Ulbrich
118	13	-38.721.770	-72.587.844	104	Raukaua valdiviensis	3	Shrub	Liana	Adhesive roots	42	Trunk	Eucryphia cordifolia	Live	28	No	2014-12-19	J. Pincheira-Ulbrich
119	13	-38.721.770	-72.587.844	105	Hymenophyllum plicatum	8	Herb	Epiphyte	NA	42	Trunk	Eucryphia cordifolia	Live	28	Yes	2014-12-19	J. Pincheira-Ulbrich
120	14	-38.721.703	-72.587.673	106	Cissus striata	5	Shrub	Liana	Tendrils	43	Trunk	Laurelia sempervirens	Live	63	Yes	2014-12-19	J. Pincheira-Ulbrich	10 Cryptocarya alba saplings
121	14	-38.721.703	-72.587.673	107	Hydrangea serratifolia	3	Shrub	Liana	Adhesive roots	43	Trunk	Laurelia sempervirens	Live	63	No	2014-12-19	J. Pincheira-Ulbrich	Sarmienta repens outside the quadrant
122	14	-38.721.703	-72.587.673	108	Sarmienta scandens	10	Subshrubs	Epiphyte	Adhesive roots	43	Trunk	Laurelia sempervirens	Live	63	Yes	2014-12-19	J. Pincheira-Ulbrich
123	14	-38.721.703	-72.587.673	109	Hydrangea serratifolia	2	Shrub	Liana	Adhesive roots	44	Trunk	Aextoxicon punctatum	Live	13	No	2014-12-19	J. Pincheira-Ulbrich
124	14	-38.721.703	-72.587.673	110	Lapageria rosea	1	Shrub	Vine	Twining	45	Fallen log	NA	Woody debris	NA	No	2014-12-19	J. Pincheira-Ulbrich
125	14	-38.721.703	-72.587.673	111	Lapageria rosea	2	Shrub	Vine	Twining	46	Soil	NA	NA	NA	No	2014-12-19	J. Pincheira-Ulbrich
126	14	-38.721.703	-72.587.673	112	Synammia feuillei	6	Herb	Epiphyte	NA	46	Soil	NA	NA	NA	No	2014-12-19	J. Pincheira-Ulbrich
127	14	-38.721.703	-72.587.673	113	Hydrangea serratifolia	1	Shrub	Liana	Adhesive roots	46	Soil	NA	NA	NA	No	2014-12-19	J. Pincheira-Ulbrich
128	15	-38.721.418	-72.586.936	114	Asplenium trilobum	78	Herb	Epiphyte	NA	47	Trunk	Cryptocarya alba	Live	31	No	2014-12-19	J. Pincheira-Ulbrich	Outside the quadrant: Lapageria rosea, Cissus striata, Luzuriaga radicans
129	15	-38.721.418	-72.586.936	115	Hymenophyllum plicatum	67	Herb	Epiphyte	NA	47	Trunk	Cryptocarya alba	Live	31	No	2014-12-19	J. Pincheira-Ulbrich	Eucryphia cordifolia saplings
130	15	-38.721.418	-72.586.936	116	Cissus striata	1	Shrub	Liana	Tendrils	47	Trunk	Cryptocarya alba	Live	31	Yes	2014-12-19	J. Pincheira-Ulbrich
131	15	-38.721.418	-72.586.936	NA	NA	NA	NA	NA	NA	48	NA	Aextoxicon punctatum	Live	19	No	2014-12-19	J. Pincheira-Ulbrich
132	15	-38.721.418	-72.586.936	NA	NA	NA	NA	NA	NA	49	NA	Aextoxicon punctatum	Live	9	No	2014-12-19	J. Pincheira-Ulbrich
133	15	-38.721.418	-72.586.936	NA	NA	NA	NA	NA	NA	50	NA	Eucryphia cordifolia	Live	35	No	2014-12-19	J. Pincheira-Ulbrich
134	15	-38.721.418	-72.586.936	117	Chusquea quila	1	Herb	Vine	Scrambling	73	Trunk	Eucryphia cordifolia	Live	UD	No	2014-12-19	J. Pincheira-Ulbrich
135	15	-38.721.418	-72.586.936	118	Sarmienta scandens	1	Subshrubs	Epiphyte	Adhesive roots	73	Trunk	Eucryphia cordifolia	Live	UD	Yes	2014-12-19	J. Pincheira-Ulbrich
136	15	-38.721.418	-72.586.936	119	Chusquea quila	10	Herb	Vine	Scrambling	73	Trunk	Eucryphia cordifolia	Live	UD	No	2014-12-19	J. Pincheira-Ulbrich
137	15	-38.721.418	-72.586.936	120	Fascicularia bicolor	1	Herb	Epiphyte	NA	73	Trunk	Eucryphia cordifolia	Live	UD	Yes	2014-12-19	J. Pincheira-Ulbrich
138	15	-38.721.418	-72.586.936	121	Raukaua valdiviensis	1	Shrub	Liana	Adhesive roots	73	Trunk	Eucryphia cordifolia	Live	UD	No	2014-12-19	J. Pincheira-Ulbrich
139	15	-38.721.418	-72.586.936	122	Luzuriaga radicans	1	Subshrubs	Vine	Adhesive roots	89	Stump	UD	Woody debris	UD	No	2014-12-19	J. Pincheira-Ulbrich
140	15	-38.721.418	-72.586.936	123	Gavilea odoratissima	1	Herb	Epiphyte	NA	91	Trunk	Eucryphia cordifolia	Live	UD	Yes	2014-12-19	J. Pincheira-Ulbrich	Gavilea odoratissima was observed outside the quadrant, at the bifurcation of the main trunk.
141	16	-38.723.362	-72.587.744	124	Sarmienta scandens	12	Subshrubs	Epiphyte	Adhesive roots	51	Trunk	Cryptocarya alba	Live	30	No	2014-12-19	J. Pincheira-Ulbrich
142	16	-38.723.362	-72.587.744	125	Hymenophyllum dentatum	170	Herb	Epiphyte	NA	52	Fallen log	NA	Woody debris	NA	No	2014-12-19	J. Pincheira-Ulbrich
143	16	-38.723.362	-72.587.744	126	Hymenophyllum plicatum	46	Herb	Epiphyte	NA	52	Fallen log	NA	Woody debris	NA	No	2014-12-19	J. Pincheira-Ulbrich
144	17	-38.727.348	-72.590.532	127	Hymenophyllum tunbrigense	130	Herb	Terricolous	NA	53	Footpath slope	NA	NA	NA	No	2015-06-25	J. Pincheira-Ulbrich
145	17	-38.727.348	-72.590.532	128	Hydrangea serratifolia	10	Shrub	Liana	Adhesive roots	53	Footpath slope	NA	NA	NA	No	2015-06-25	J. Pincheira-Ulbrich
146	18	-38.726.417	-72.585.548	129	Lapageria rosea	1	Shrub	Vine	Twining	54	Trunk	Eucryphia cordifolia	Snag	36,2	No	2015-05-29	J. Pincheira-Ulbrich
147	18	-38.726.417	-72.585.548	130	Hymenophyllum plicatum	8	Herb	Epiphyte	NA	54	Trunk	Eucryphia cordifolia	Snag	36,2	No	2015-05-29	J. Pincheira-Ulbrich
148	18	-38.726.417	-72.585.548	131	Hymenophyllum dicranotrichum	392	Herb	Epiphyte	NA	54	Trunk	Eucryphia cordifolia	Snag	36,2	No	2015-05-29	J. Pincheira-Ulbrich
149	18	-38.726.417	-72.585.548	132	Hymenophyllum krauseanum	471	Herb	Epiphyte	NA	55	Trunk	Eucryphia cordifolia	Snag	140	No	2015-05-29	J. Pincheira-Ulbrich
150	18	-38.726.417	-72.585.548	133	Hymenophyllum peltatum	334	Herb	Epiphyte	NA	55	Trunk	Eucryphia cordifolia	Snag	140	No	2015-05-29	J. Pincheira-Ulbrich
151	18	-38.726.417	-72.585.548	134	Hymenophyllum plicatum	192	Herb	Epiphyte	NA	55	Trunk	Eucryphia cordifolia	Snag	140	Yes	2015-05-29	J. Pincheira-Ulbrich
152	18	-38.726.417	-72.585.548	135	Sarmienta scandens	2	Subshrubs	Epiphyte	Adhesive roots	55	Trunk	Eucryphia cordifolia	Snag	140	Yes	2015-05-29	J. Pincheira-Ulbrich
153	18	-38.726.417	-72.585.548	136	Hymenophyllum cuneatum	83	Herb	Epiphyte	NA	55	Trunk	Eucryphia cordifolia	Snag	140	No	2015-05-29	J. Pincheira-Ulbrich
154	18	-38.726.417	-72.585.548	137	Hymenophyllum plicatum	30	Herb	Epiphyte	NA	56	Fallen log	NA	Woody debris	35	No	2015-05-29	J. Pincheira-Ulbrich
155	19	-38.726.207	-72.585.440	138	Hymenophyllum pectinatum	148	Herb	Epiphyte	NA	57	Trunk	Eucryphia cordifolia	Snag	88	No	2015-05-29	J. Pincheira-Ulbrich
156	19	-38.726.207	-72.585.440	139	Hymenophyllum plicatum	1	Herb	Epiphyte	NA	57	Trunk	Eucryphia cordifolia	Snag	88	Yes	2015-05-29	J. Pincheira-Ulbrich
157	19	-38.726.207	-72.585.440	140	Fascicularia bicolor	1	Herb	Epiphyte	NA	57	Trunk	Eucryphia cordifolia	Snag	88	Yes	2015-05-29	J. Pincheira-Ulbrich
158	19	-38.726.207	-72.585.440	141	Raukaua valdiviensis	1	Shrub	Liana	Adhesive roots	57	Trunk	Eucryphia cordifolia	Snag	88	No	2015-05-29	J. Pincheira-Ulbrich
159	19	-38.726.207	-72.585.440	142	Hymenophyllum krauseanum	25	Herb	Epiphyte	NA	57	Trunk	Eucryphia cordifolia	Snag	88	No	2015-05-29	J. Pincheira-Ulbrich
160	20	-38.726.367	-72.585.343	143	Hymenophyllum krauseanum	36	Herb	Epiphyte	NA	58	Stump	NA	Woody debris	40	No	2015-05-29	J. Pincheira-Ulbrich	Asplenium trilobum outside the quadrant
161	20	-38.726.367	-72.585.343	144	Hymenophyllum caudiculatum	40	Herb	Epiphyte	NA	58	Stump	NA	Woody debris	40	No	2015-05-29	J. Pincheira-Ulbrich
162	21	-38.725.971	-72.585.805	145	Hymenophyllum pectinatum	6	Herb	Epiphyte	NA	59	Trunk	Eucryphia cordifolia	Snag	65	No	2015-06-12	J. Pincheira-Ulbrich	Eucryphia cordifolia sapling
163	21	-38.725.971	-72.585.805	146	Raukaua valdiviensis	1	Shrub	Liana	Adhesive roots	59	Trunk	Eucryphia cordifolia	Snag	65	No	2015-06-12	J. Pincheira-Ulbrich
164	21	-38.725.971	-72.585.805	147	Asplenium dareoides	33	Herb	Epiphyte	NA	59	Trunk	Eucryphia cordifolia	Snag	65	No	2015-06-12	J. Pincheira-Ulbrich
165	21	-38.725.971	-72.585.805	148	Hymenophyllum dicranotrichum	6	Herb	Epiphyte	NA	59	Trunk	Eucryphia cordifolia	Snag	65	No	2015-06-12	J. Pincheira-Ulbrich
166	21	-38.725.971	-72.585.805	149	Hymenophyllum tunbrigense	62	Herb	Epiphyte	NA	59	Trunk	Eucryphia cordifolia	Snag	65	No	2015-06-12	J. Pincheira-Ulbrich
167	22	-38.724.031	-72.585.168	150	Hymenophyllum pectinatum	7	Herb	Epiphyte	NA	60	Trunk	Eucryphia cordifolia	Snag	54	No	2015-06-12	J. Pincheira-Ulbrich	Outside the quadrant: Peumus boldus, Lapageria rosea, Aextoxicon punctatum
168	22	-38.724.031	-72.585.168	151	Hymenophyllum caudiculatum	23	Herb	Epiphyte	NA	60	Trunk	Eucryphia cordifolia	Snag	54	No	2015-06-12	J. Pincheira-Ulbrich
169	22	-38.724.031	-72.585.168	152	Hymenophyllum tunbrigense	7	Herb	Epiphyte	NA	60	Trunk	Eucryphia cordifolia	Snag	54	No	2015-06-12	J. Pincheira-Ulbrich
170	22	-38.724.031	-72.585.168	153	Hydrangea serratifolia	3	Shrub	Liana	Adhesive roots	61	Trunk	Aextoxicon punctatum	Snag	41	No	2015-06-12	J. Pincheira-Ulbrich
171	22	-38.724.031	-72.585.168	154	Lapageria rosea	1	Shrub	Vine	Twining	61	Trunk	Aextoxicon punctatum	Snag	41	No	2015-06-12	J. Pincheira-Ulbrich
172	22	-38.724.031	-72.585.168	155	Hymenophyllum plicatum	18	Herb	Epiphyte	NA	61	Trunk	Aextoxicon punctatum	Snag	41	No	2015-06-12	J. Pincheira-Ulbrich
173	23	-38.727.045	-72.588.034	156	Cissus striata	5	Shrub	Liana	Tendrils	62	Trunk	Cryptocarya alba	Live	32	No	2015-06-26	J. Pincheira-Ulbrich	Aextoxicon punctatum and Cryptocarya alba sapling
174	23	-38.727.045	-72.588.034	157	Hymenophyllum pectinatum	15	Herb	Epiphyte	NA	62	Trunk	Cryptocarya alba	Live	32	No	2015-06-26	J. Pincheira-Ulbrich	Proustia pyrifolia outside the quadrant
175	23	-38.727.045	-72.588.034	158	Hymenophyllum tunbrigense	4	Herb	Epiphyte	NA	62	Trunk	Cryptocarya alba	Live	32	No	2015-06-26	J. Pincheira-Ulbrich
176	23	-38.727.045	-72.588.034	159	Lapageria rosea	10	Shrub	Vine	Twining	63	Trunk	Cryptocarya alba	Live	32	No	2015-06-26	J. Pincheira-Ulbrich
177	23	-38.727.045	-72.588.034	160	Hymenophyllum tunbrigense	4	Herb	Epiphyte	NA	63	Trunk	Cryptocarya alba	Live	32	No	2015-06-26	J. Pincheira-Ulbrich
178	23	-38.727.045	-72.588.034	NA	NA	NA	NA	NA	NA	64	NA	Peumus boldus	Live	17	No	2015-06-26	J. Pincheira-Ulbrich
179	23	-38.727.045	-72.588.034	161	Hymenophyllum plicatum	32	Herb	Epiphyte	NA	65	Trunk	Cryptocarya alba	Live	16,5	No	2015-06-26	J. Pincheira-Ulbrich
180	23	-38.727.045	-72.588.034	162	Asplenium trilobum	2	Herb	Epiphyte	NA	66	Trunk	Peumus boldus	Live	12,5	No	2015-06-26	J. Pincheira-Ulbrich
181	23	-38.727.045	-72.588.034	163	Lapageria rosea	2	Shrub	Vine	Twining	67	Soil	NA	NA	NA	No	2015-06-26	J. Pincheira-Ulbrich
182	24	-38.726.440	-72.587.986	164	Hydrangea serratifolia	4	Shrub	Liana	Adhesive roots	68	Trunk	Aextoxicon punctatum	Live	52	No	2015-06-26	J. Pincheira-Ulbrich	Cryptocarya alba saplings
183	24	-38.726.440	-72.587.986	165	Raukaua valdiviensis	3	Shrub	Liana	Adhesive roots	68	Trunk	Aextoxicon punctatum	Live	52	Yes	2015-06-26	J. Pincheira-Ulbrich	Proustia pyrifolia Outside the quadrant
184	24	-38.726.440	-72.587.986	166	Tropaeolum ciliatum	1	Herb	Vine	Twining	68	Trunk	Aextoxicon punctatum	Live	52	No	2015-06-26	J. Pincheira-Ulbrich
185	24	-38.726.440	-72.587.986	167	Luzuriaga radicans	2	Subshrubs	Vine	Adhesive roots	68	Trunk	Aextoxicon punctatum	Live	52	No	2015-06-26	J. Pincheira-Ulbrich
186	24	-38.726.440	-72.587.986	168	Lapageria rosea	1	Shrub	Vine	Twining	68	Trunk	Aextoxicon punctatum	Live	52	No	2015-06-26	J. Pincheira-Ulbrich
187	24	-38.726.440	-72.587.986	169	Elytropus chilensis	2	Shrub	Vine	Twining	69	Soil	NA	NA	NA	No	2015-06-26	J. Pincheira-Ulbrich
188	24	-38.726.440	-72.587.986	170	Boquila trifoliolata	1	Shrub	Vine	NA	69	Soil	NA	NA	NA	No	2015-06-26	J. Pincheira-Ulbrich
189	24	-38.726.440	-72.587.986	171	Raukaua valdiviensis	1	Shrub	Liana	Adhesive roots	69	Soil	NA	NA	NA	No	2015-06-26	J. Pincheira-Ulbrich
190	24	-38.726.440	-72.587.986	172	Hedera helix	1	Shrub	Vine	Adhesive roots	69	Soil	NA	NA	NA	No	2015-06-26	J. Pincheira-Ulbrich
191	24	-38.726.440	-72.587.986	173	Hedera helix	1	Shrub	Vine	Adhesive roots	87	Soil	NA	NA	NA	No	2015-06-26	J. Pincheira-Ulbrich
192	25	-38.722.425	-72.585.096	174	Hymenophyllum krauseanum	8	Herb	Epiphyte	NA	70	Trunk	Aextoxicon punctatum	Live	57	No	2015-06-26	J. Pincheira-Ulbrich	Asplenium trilobum Outside the quadrant
193	25	-38.722.425	-72.585.096	175	Hymenophyllum caudiculatum	39	Herb	Epiphyte	NA	70	Trunk	Aextoxicon punctatum	Live	57	No	2015-06-26	J. Pincheira-Ulbrich
194	25	-38.722.425	-72.585.096	176	Hymenophyllum plicatum	170	Herb	Epiphyte	NA	70	Trunk	Aextoxicon punctatum	Live	57	No	2015-06-26	J. Pincheira-Ulbrich
195	25	-38.722.425	-72.585.096	177	Fascicularia bicolor	1	Herb	Epiphyte	NA	70	Trunk	Aextoxicon punctatum	Live	57	No	2015-06-26	J. Pincheira-Ulbrich
196	25	-38.722.425	-72.585.096	178	Hymenophyllum tunbrigense	1169	Herb	Epiphyte	NA	70	Trunk	Aextoxicon punctatum	Live	57	No	2015-06-26	J. Pincheira-Ulbrich
197	25	-38.722.425	-72.585.096	179	Hymenophyllum krauseanum	8	Herb	Epiphyte	NA	71	Trunk	Aextoxicon punctatum	Live	12	No	2015-06-26	J. Pincheira-Ulbrich
198	25	-38.722.425	-72.585.096	180	Hymenophyllum caudiculatum	39	Herb	Epiphyte	NA	71	Trunk	Aextoxicon punctatum	Live	12	No	2015-06-26	J. Pincheira-Ulbrich
199	25	-38.722.425	-72.585.096	181	Hymenophyllum plicatum	98	Herb	Epiphyte	NA	71	Trunk	Aextoxicon punctatum	Live	12	No	2015-06-26	J. Pincheira-Ulbrich
200	25	-38.722.425	-72.585.096	182	Fascicularia bicolor	1	Herb	Epiphyte	NA	71	Trunk	Aextoxicon punctatum	Live	12	No	2015-06-26	J. Pincheira-Ulbrich
201	25	-38.722.425	-72.585.096	183	Hymenophyllum tunbrigense	1129	Herb	Epiphyte	NA	71	Trunk	Aextoxicon punctatum	Live	12	No	2015-06-26	J. Pincheira-Ulbrich
202	25	-38.722.425	-72.585.096	184	Lardizabala biternata	1	Shrub	Liana	Twining	90	Soil	NA	NA	NA	No	2015-06-26	J. Pincheira-Ulbrich
203	25	-38.722.425	-72.585.096	185	Lapageria rosea	1	Shrub	Vine	Twining	90	Soil	NA	NA	NA	No	2015-06-26	J. Pincheira-Ulbrich
204	25	-38.722.425	-72.585.096	186	Chusquea quila	3	Herb	Terricolous	NA	90	Soil	NA	NA	NA	No	2015-06-26	J. Pincheira-Ulbrich
205	26	-38.721.135	-72.584.162	187	Synammia feuillei	8	Herb	Epiphyte	NA	75	Trunk	Pinus radiata	Live	UD	No	2014-11-06	J. Pincheira-Ulbrich	Outside the quadrant: Proustia pyrifolia, Pseudopanax valdiviensis, Lardizabala biternata, Cissus striata, Luzuriaga radicans
206	26	-38.721.128	-72.584.162	188	Sarmienta scandens	10	Subshrubs	Epiphyte	Adhesive roots	75	Trunk	Pinus radiata	Live	UD	No	2014-11-06	J. Pincheira-Ulbrich	Outside the quadrant: Aextoxicon punctatum, Nothofagus obliqua, Lomatia dentata
207	27	-38.726.053	-72.582.238	189	Dioscorea spp	1	Herb	Vine	Twining	74	Footpath slope	NA	NA	NA	No	2014-11-06	J. Pincheira-Ulbrich
208	27	-38.726.053	-72.582.238	190	Gavilea spp.	1	Herb	Terricolous	NA	74	Footpath slope	NA	NA	NA	No	2014-11-06	J. Pincheira-Ulbrich
209	27	-38.726.053	-72.582.238	191	Boquila trifoliolata	1	Shrub	Vine	NA	74	Footpath slope	NA	NA	NA	No	2014-11-06	J. Pincheira-Ulbrich
210	27	-38.726.053	-72.582.238	192	Hymenophyllum tunbrigense	10	Herb	Terricolous	NA	74	Footpath slope	NA	NA	NA	No	2014-11-06	J. Pincheira-Ulbrich
211	27	-38.726.053	-72.582.238	193	Luzuriaga radicans	1	Subshrubs	Vine	Adhesive roots	74	Footpath slope	NA	NA	NA	No	2014-11-06	J. Pincheira-Ulbrich
